# Supplementary material for: Phagocytosis Escape by a Staphylococcus aureus Protein That Connects Complement and Coagulation Proteins at the Bacterial Surface
Source: PLOS journal article supplement (doi:10.1371/journal.ppat.1003816), 2013-12-12

**Supplemental figure S3**

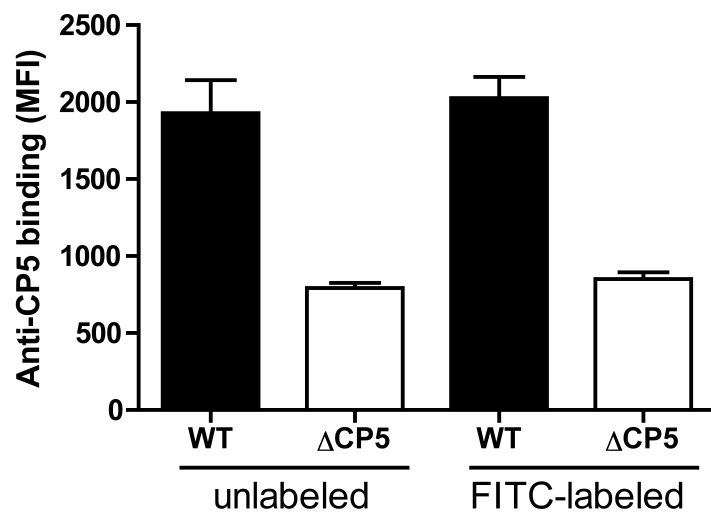

Supplement: S3 (10.1371/journal.ppat.1003816.s003) [file journal.ppat.1003816.s003]
